# Supplementary material for: Association between Expression of Connective Tissue Genes and Prostate Cancer Growth and Progression
Source: MDPI journal article supplement (doi:10.3390/ijms24087520), 2023-04-19
Supplement: s1 [file s1]

# FOCAL ADHESION

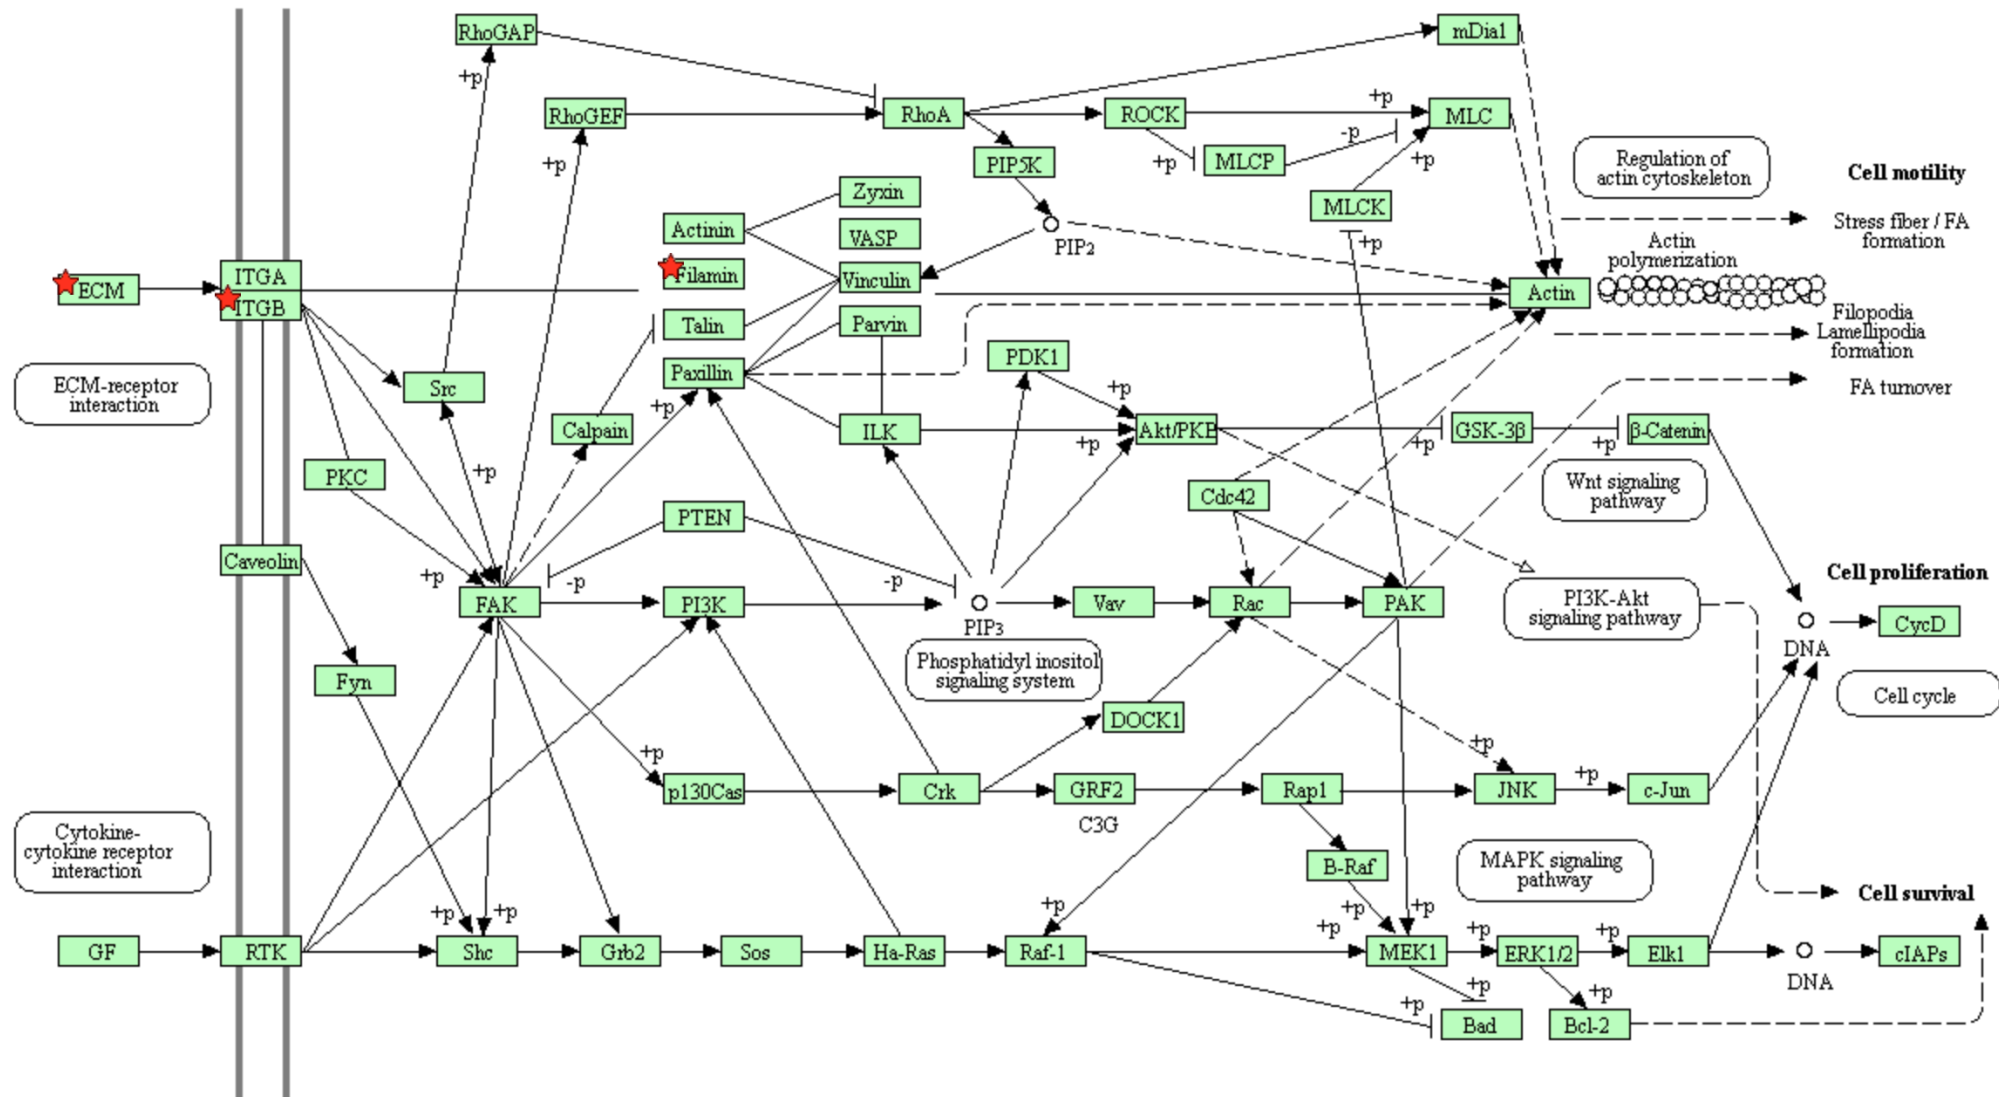

**Supplementary Figure S2:** Pathway association analysis revealed activation of the focal adhesion pathway, directed by the selected genes regulating (functionally associated with the connective tissue).
