# Supplementary material for: Association between Expression of Connective Tissue Genes and Prostate Cancer Growth and Progression
Source: MDPI journal article supplement (doi:10.3390/ijms24087520), 2023-04-19
Supplement: s1 [file s1]

# ECM-RECEPTOR INTERACTION

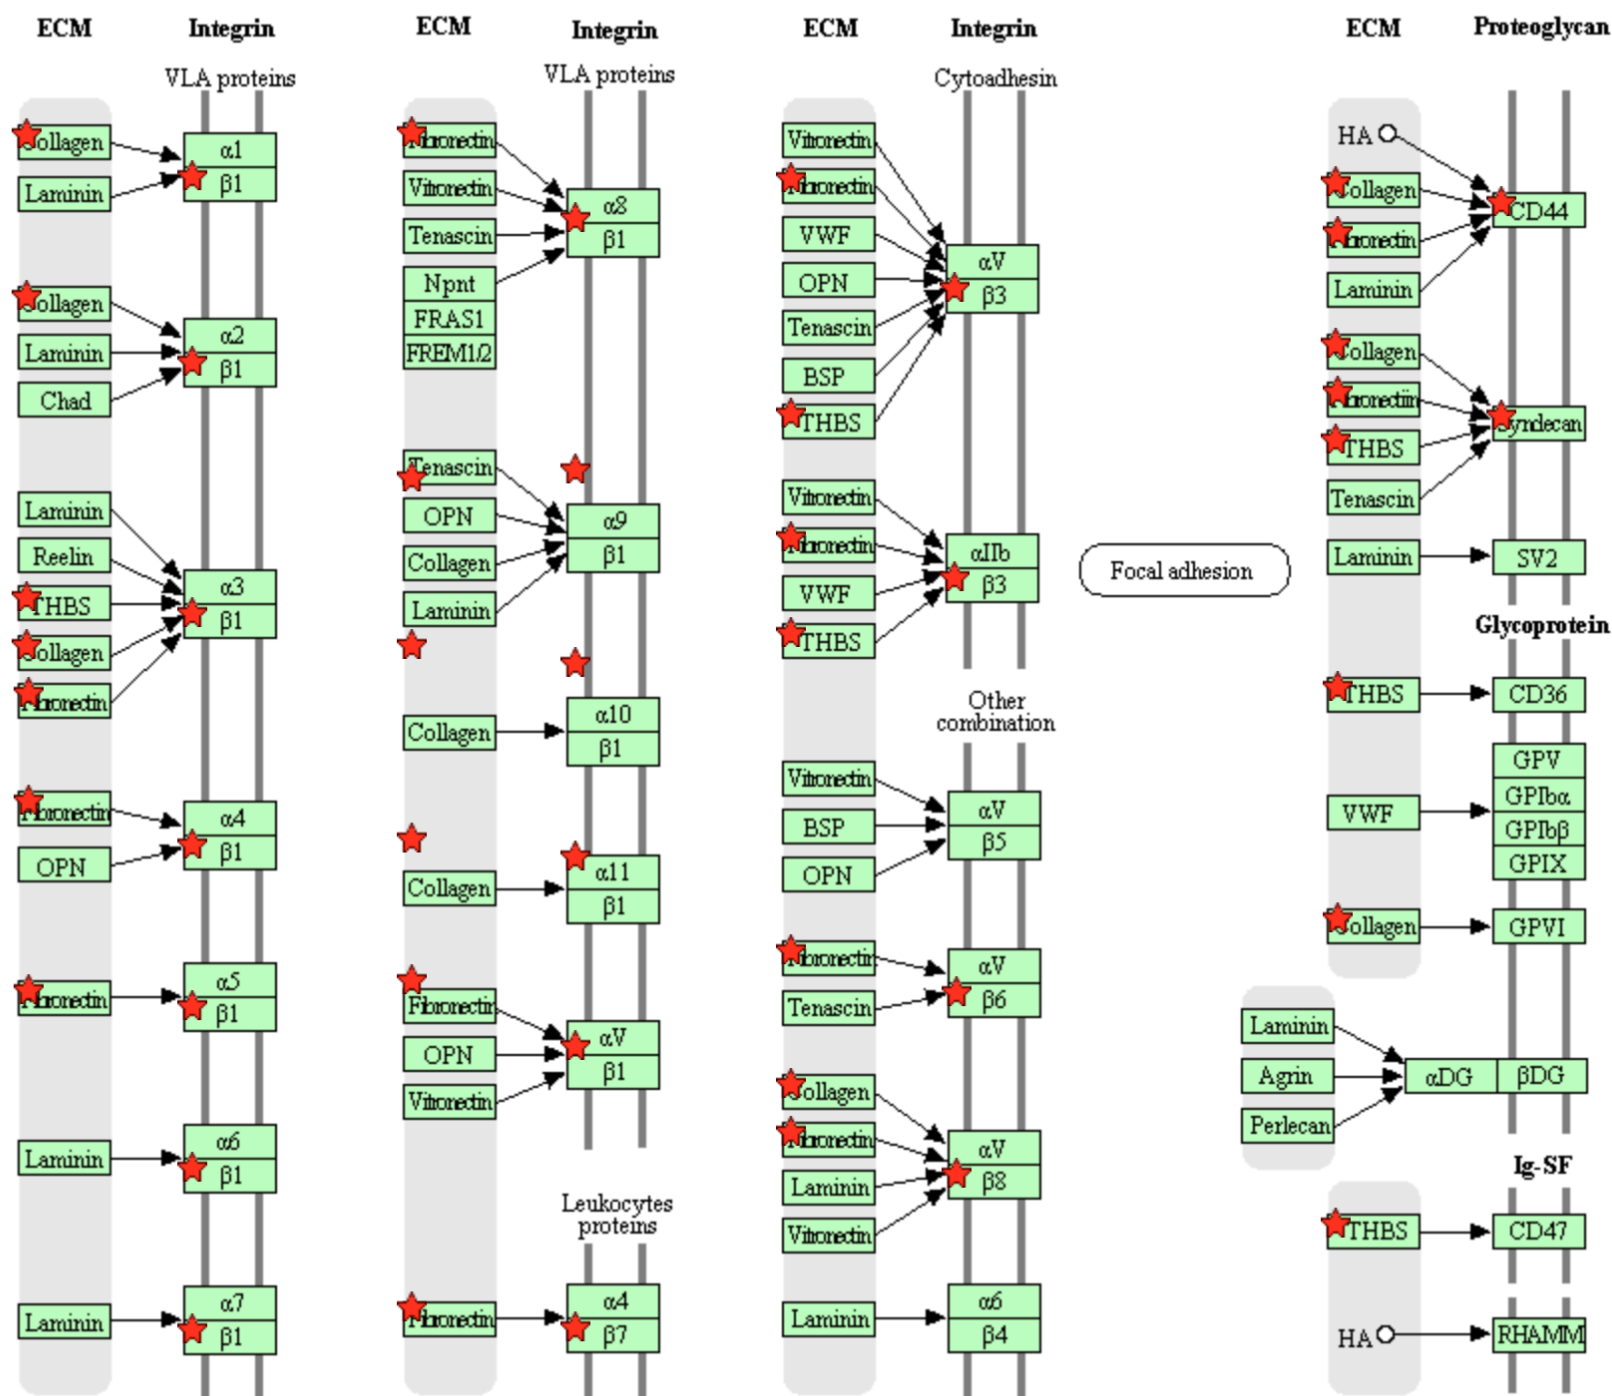

**Supplementary Figure S1:** Pathway Association analysis: Selection of the connective tissue related genes converge in the ECM-receptor signaling interaction pathway in prostate cancer cells.
